# Supplementary material for: High-performance suction feeding in an early elasmobranch
Source: PubMed Central journal article supplement — Sci Adv. 2019 Sep 11;5(9):eaax2742. doi: 10.1126/sciadv.aax2742 (PMC6739094; doi:10.1126/sciadv.aax2742), 2019-09-11
Supplement: aax2742_SM.pdf [file aax2742_SM.pdf]

## Supplementary Materials for

### High-performance suction feeding in an early elasmobranch

Michael I. Coates\*, Kristen Tietjen, Aaron M. Olsen, John A. Finarelli

\*Corresponding author. Email: mcoates@uchicago.edu

Published 11 September 2019, *Sci. Adv.* **5**, eaax2742 (2019)

DOI: 10.1126/sciadv.aax2742

#### The PDF file includes:

- Fig. S1. *Tristychius arcuatus*, renderings of key specimens.
- Fig. S2. Mandibular arch cartilages of *T. arcuatus*.
- Fig. S3. Hyoid arch and pectoral girdle of *T. arcuatus*.
- Fig. S4. *T. arcuatus*: physical model showing interconnected 3D four-bar linkages.
- Fig. S5. The cranial skeleton of a juvenile *Chiloscyllium punctatum* reconstructed from high-resolution computed tomography.
- Fig. S6. Conformations of the skull of *T. arcuatus*.
- Fig. S7. Filtering the dataset of *T. arcuatus* cranial conformations.
- Fig. S8. Morphospace for early gnathostomes relative to jaw measurement characters from Anderson *et al.* (36).
- Fig. S9. Life restoration of *T. arcuatus* from the Viséan Wardie Shales of Edinburgh, Scotland.
- Table S1. *T. arcuatus* specimens contributing to study.
- Table S2. Measurements of oral volume (milliliters) from physical model of *T. arcuatus*.
- Table S3. Additions to Anderson *et al.* (36) dataset of mandible metrics.
- Legends for movies S1 to S6
- References (68–77)

#### Other Supplementary Material for this manuscript includes the following:

(available at [advances.sciencemag.org/cgi/content/full/5/9/eaax2742/DC1](https://advances.sciencemag.org/cgi/content/full/5/9/eaax2742/DC1))

- Movie S1 (.mov format). Jaw and hyoid motion sequences modeled in caudal view.
- Movie S2 (.mov format). Jaw and hyoid motion sequences modeled in cranial view.
- Movie S3 (.mov format). Jaw and hyoid motion sequences modeled in dorsal view.
- Movie S4 (.mov format). Jaw and hyoid motion sequences modeled in lateral view.
- Movie S5 (.mov format). Jaw and hyoid motion sequences modeled in ventral view.
- Movie S6 (.mp4 format). Animation of complete cranial to pectoral skeleton opening and closing jaws, ingesting prey.

**SUPPLEMENTARY FIGURES**

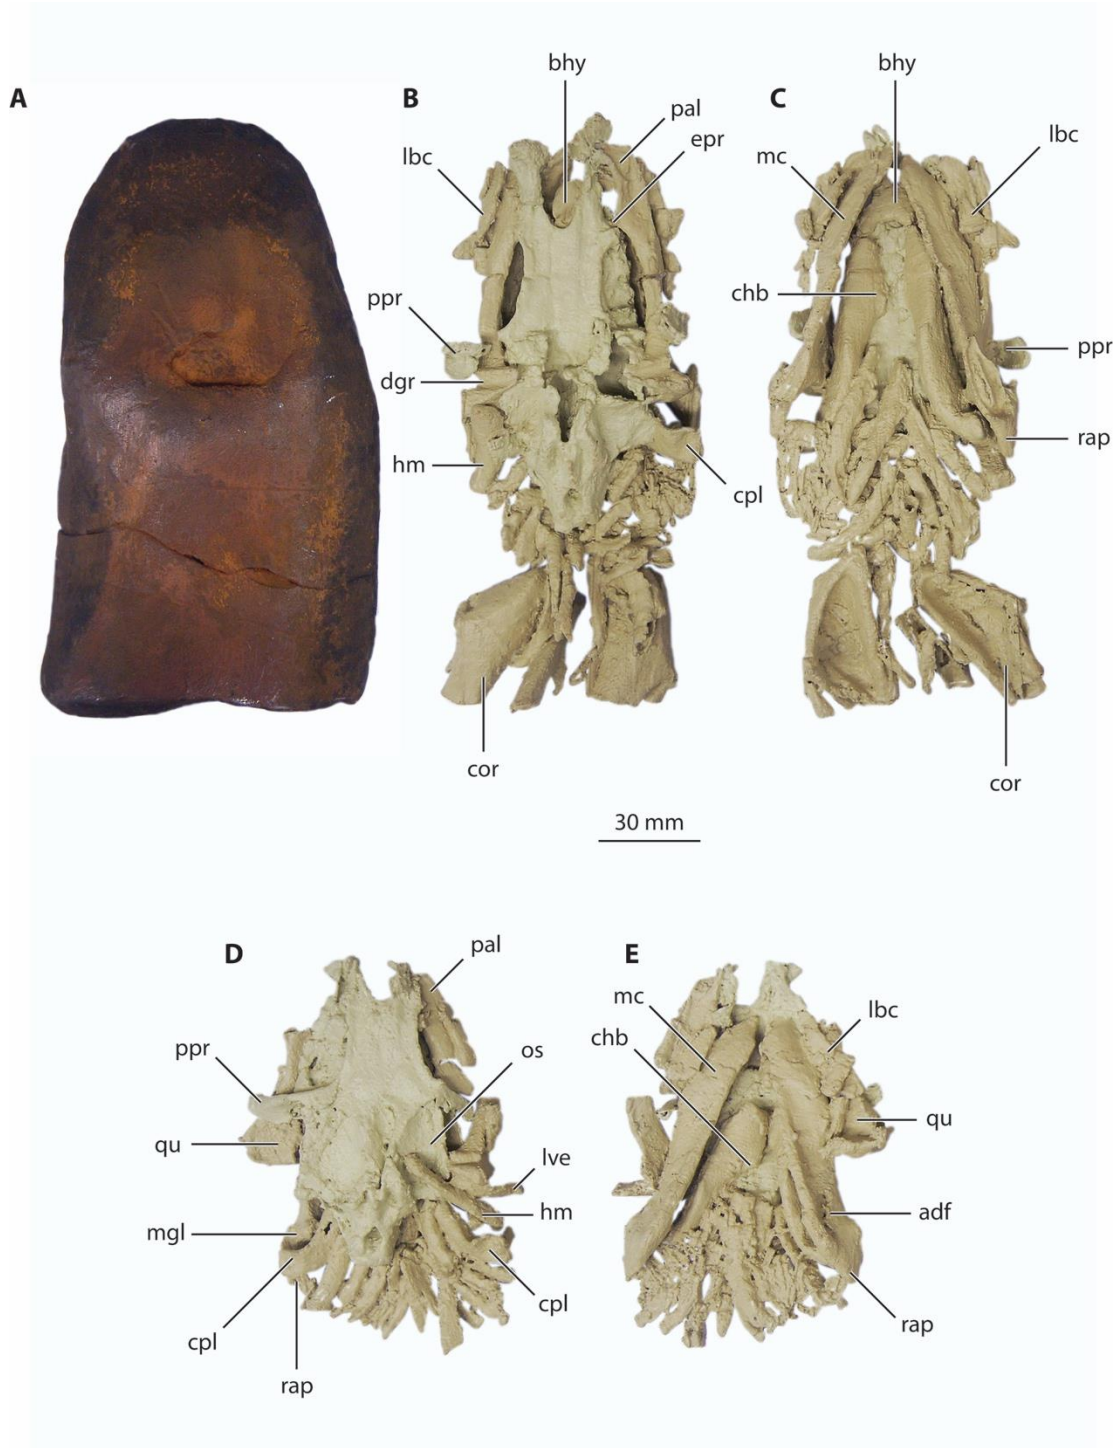

**Fig. S1. *Tristychius arcuatus*, renderings of key specimens.** (A) Complete concretion (NMS 1974.23.6). (B) Rendered pectoral, branchial and cranial cartilages in dorsal view (NMS 1974.23.6) and (C) ventral view. (D) Rendered branchial and cranial cartilages in dorsal view (NMS 1974.23.20) and (E) ventral view. adf, adductor fossa; bhy, basihyal; chb, ceratohyal blade; cor, coracoid; cpl, ceratohyal platform; dgr, dorsal groove; epr, ethmoid process; hm, hyomandibula; lbc, labial cartilage chain; lve, lateroventral extremity of palatoquadrate; mc, Meckel's cartilage; mgl, mandibular glenoid; os, otic shelf; pal, palatine process; ppr, postorbital process; qu, quadrate; rap, retroarticular process.

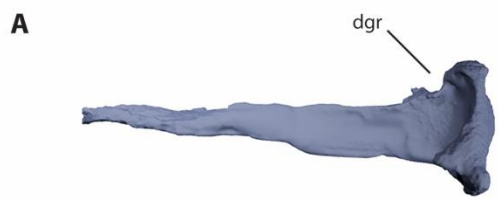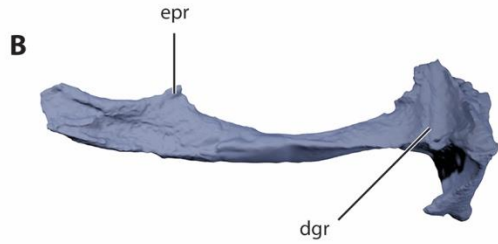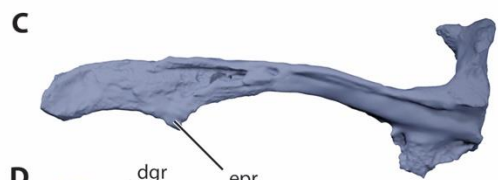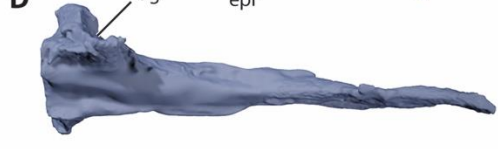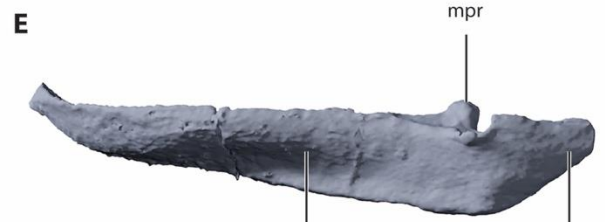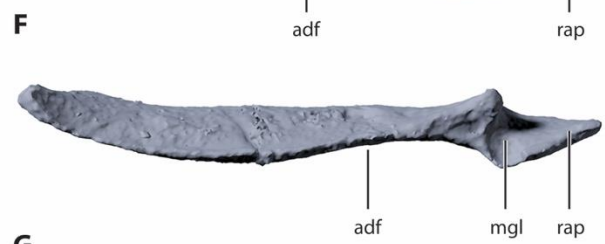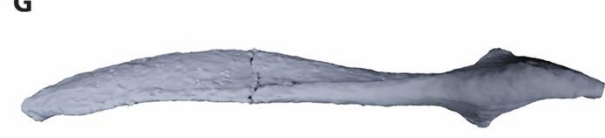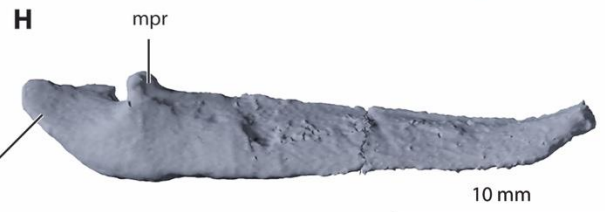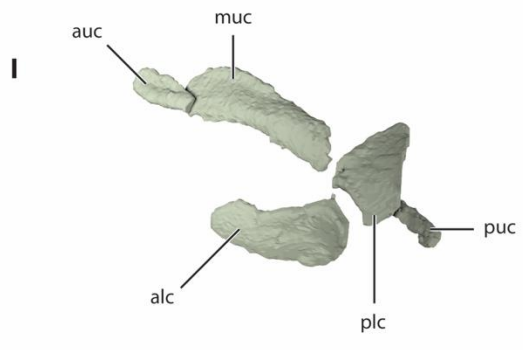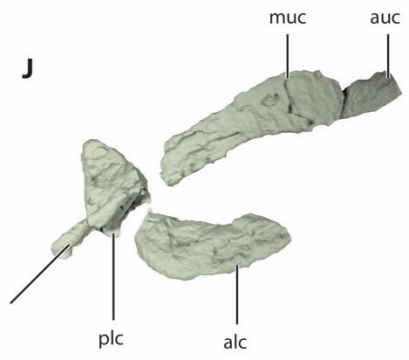

**Fig. S2. Mandibular arch cartilages of *T. arcuatus*.** Left palatoquadrate (NMS 1974.23.6) in (A) lateral, (B) dorsal, (C) ventral, and (D) ventral views. Left Meckel's cartilage (NMS 1974.23.6) in (E) lateral, (F) dorsal, (G) ventral, and (H) mesial views. Left labial cartilage chain (NMS 1974.23.6) in (I) lateral and (J) mesial views. adf, adductor fossa; dgr, dorsal groove; epr, ethmoid process; mgl, mandibular glenoid; mpr, mandibular process; rap, retroarticular process. Labial cartilage chain: alc, anterior lower cartilage; auc, anterior upper cartilage; muc, middle upper cartilage; plc, posterior lower cartilage; puc, posterior upper cartilage.

**A**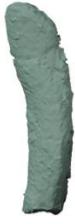**B**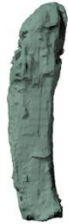**C**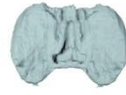**D**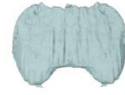**E**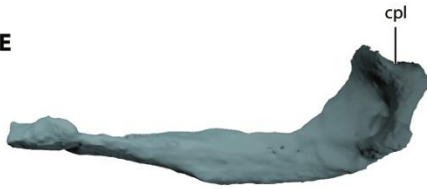**F**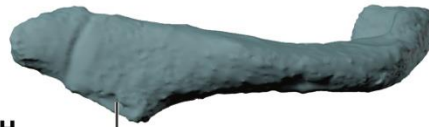**G**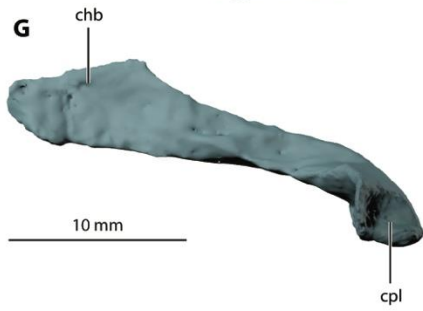**H**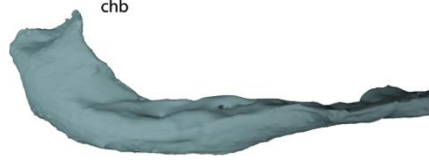**I**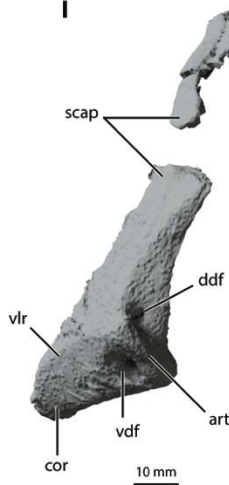**J**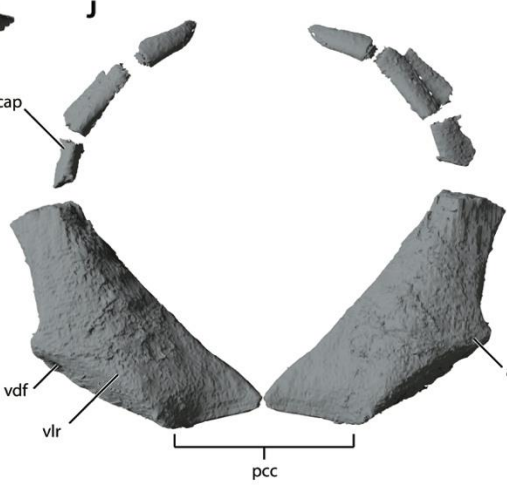**K**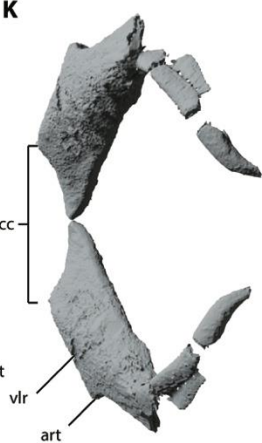

**Fig. S3. Hyoid arch and pectoral girdle of *T. arcuatus*.** Left hyomandibula (NMS 1974.23.6) in (A) lateral and (B) mesial views. Basihyal in (C) dorsal and (D) ventral views (NMS 1974.23.6). Left ceratohyal (NMS 1974.23.30) in (E) lateral, (F) ventral, (G) dorsal and (H) mesial views. Pectoral girdle in (I) left side lateral, (J) anterior, and (K) dorsal views (NMS 1974.23.6). For pectoral girdle comparison and terminology see Lane *et al.* (77). art, articular condyle; chb, ceratohyal blade; cor, coracoid; cpl, ceratohyal platform (articular surface for distal end of hyomandibula); ddf, dorsal diazonal foramen; pcc, pericardial concavity; scap, scapular process; vdf, ventral diazonal foramen; vlr, ventrolateral ridge.

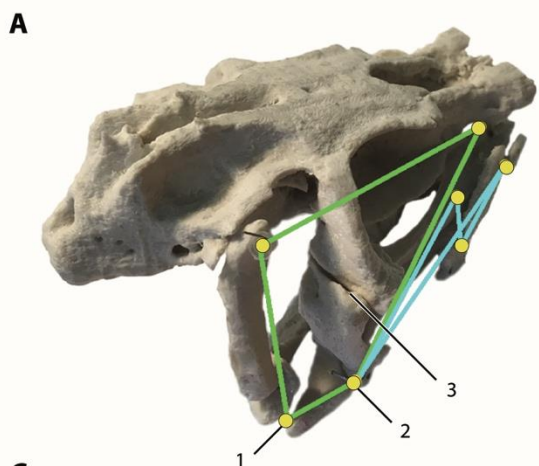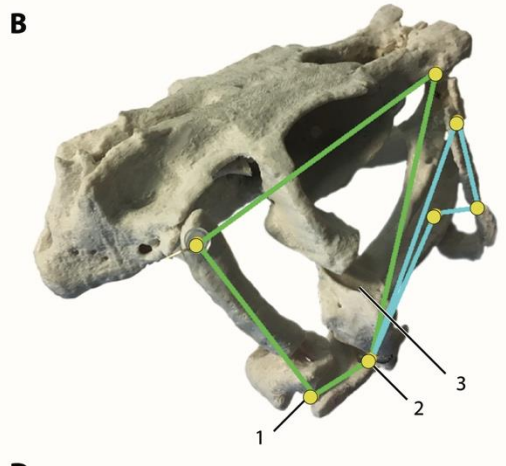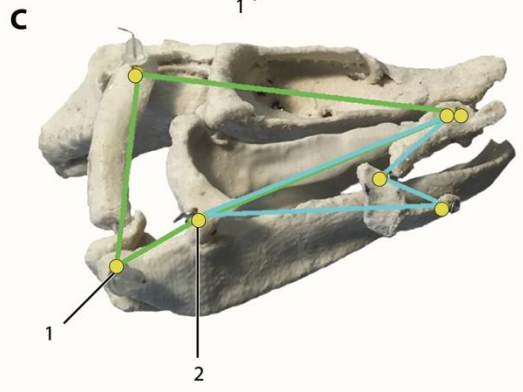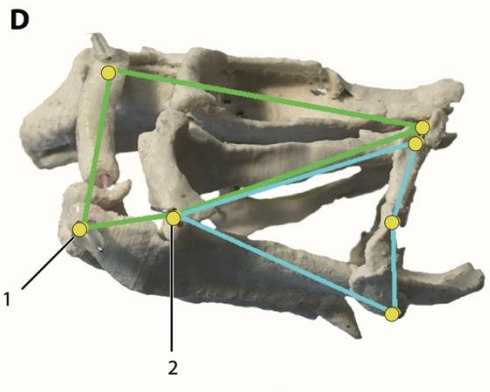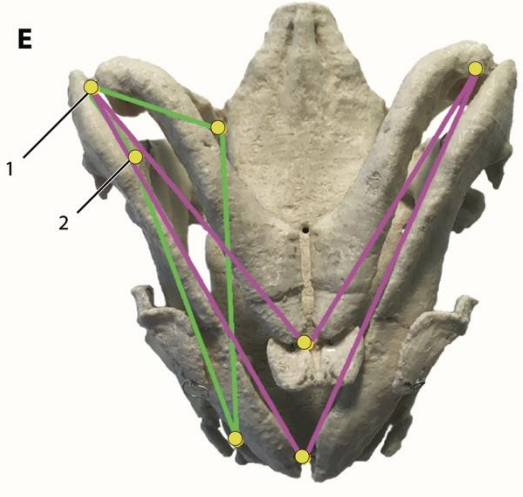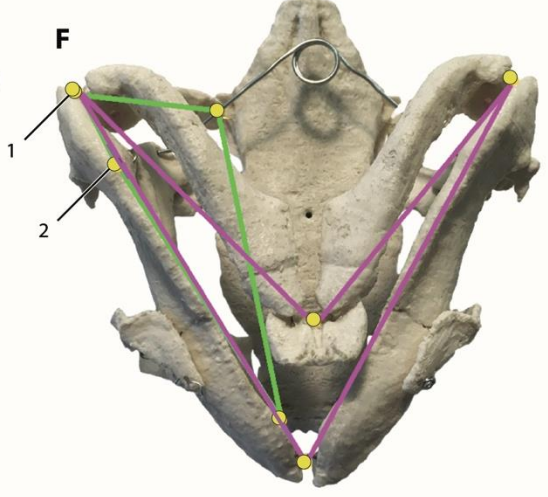



**Fig. S4. *T. arcuatus*: physical model showing interconnected 3D four-bar linkages.**

Posterodorsal and lateral view, (A) jaws closed and (B) open. Lateral view, (C) jaws closed and (D) open. Ventral view, (E) jaws closed and (F) open. Coloured bars delineate interconnected four-bar linkage systems. Green bars: hyomandibula-neurocranium-palate-mandible. Cyan bars: palate-upper labials -lower labials-mandible. Pink bars: right mandible-right ceratohyal-left ceratohyal-left mandible. Green and cyan linkage systems interconnect through the mandibulo-hyoid joint (1). Green and blue linkage systems interconnect through the jaw joint (2). Ridge and groove sliding articulation (3).

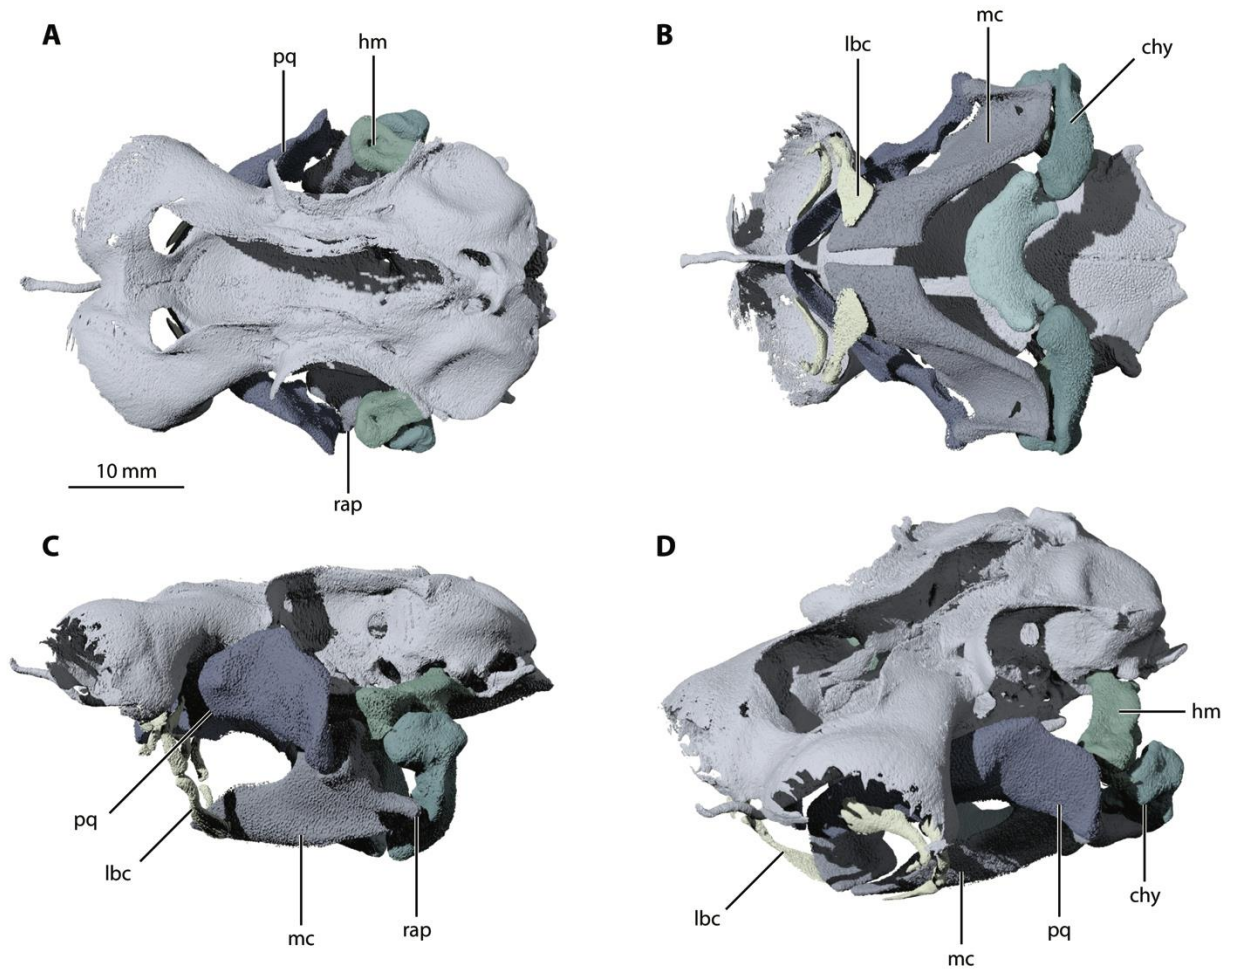

**Fig. S5.** The cranial skeleton of a juvenile *Chiloscyllium punctatum* reconstructed from high-resolution computed tomography. (A) Dorsal view; (B) ventral view; (C) left lateral view; (D) anterior dorsolateral view. chy, ceratohyal; hm, hyomandibula; lbc, labial cartilage chain; mc, Meckel's cartilage; pq, palatoquadrate; rap, retroarticular process.

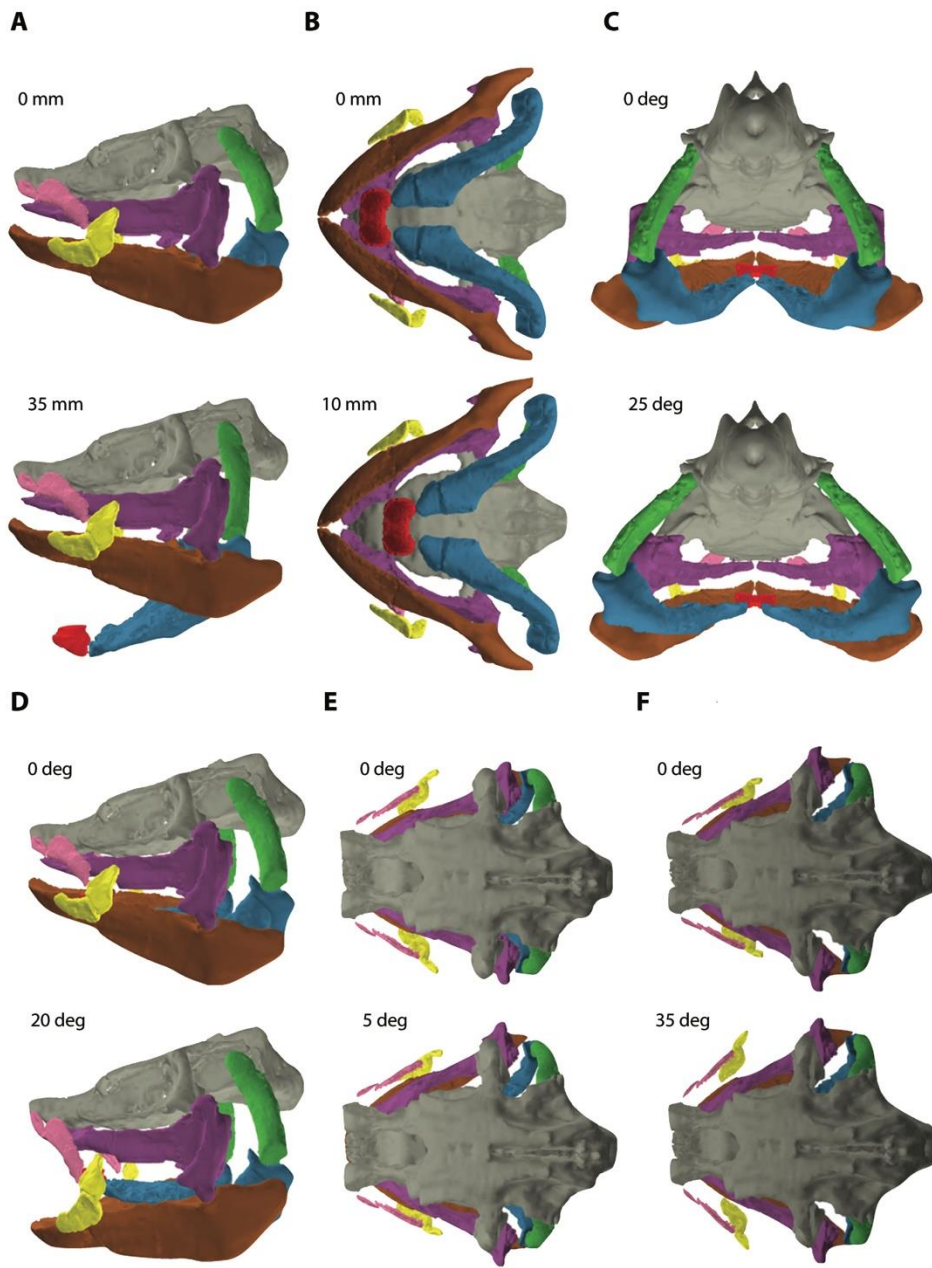

**Fig. S6. Conformations of the skull of *T. arcuatus*.** The cranial cartilages of *T. arcuatus* likely had at least 6 primary degrees of freedom of motion. **(A)** basihyal ventral translation; **(B)** basihyal caudal translation; **(C)** hyoid arch abduction; **(D)** Meckel's cartilage depression; **(E)** mandibular arch abduction; **(F)** labial cartilage flaring. Each of these motions is shown, independently, at the limits of their simulated range of movement.

**A**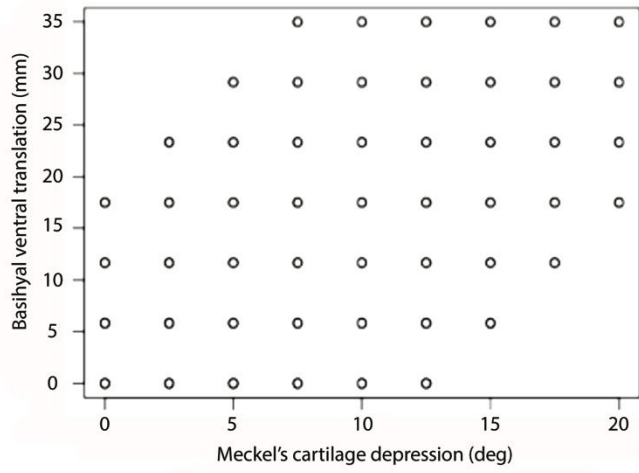**B**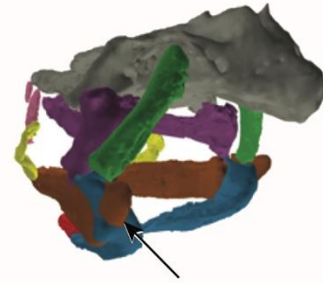**C**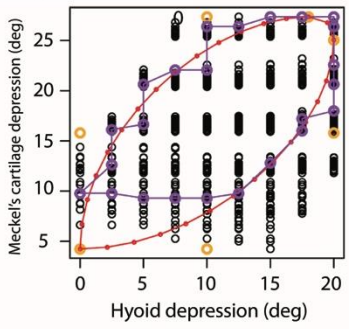**D**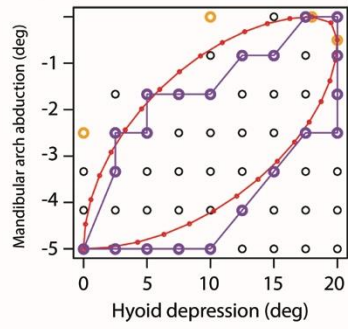**E**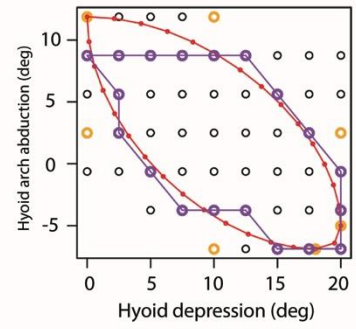

**Fig. S7. Filtering the dataset of *T. arcuatus* cranial conformations.** (A) The first criterion used to filter the multidimensional skull conformation set: each point represents a set of conformations at that particular combination of the Meckel's depression and basihyal ventral translation. Open triangular spaces in the top left and bottom right indicate conformations that were removed from the full conformation set. (B) Example of interpenetrating meshes; arrow shows intersection of ceratohyal and Meckel's cartilage. Conformations with interpenetration were filtered out of the skull conformation set. (C, D, and E) Paths or trajectories traced through a 5-dimensional skull conformation space to create a motion sequence. Red line and points: the motion path as a Bézier spline; orange points: Bézier spline control points; purple line and points: closest points in conformation space to the path.

**A**

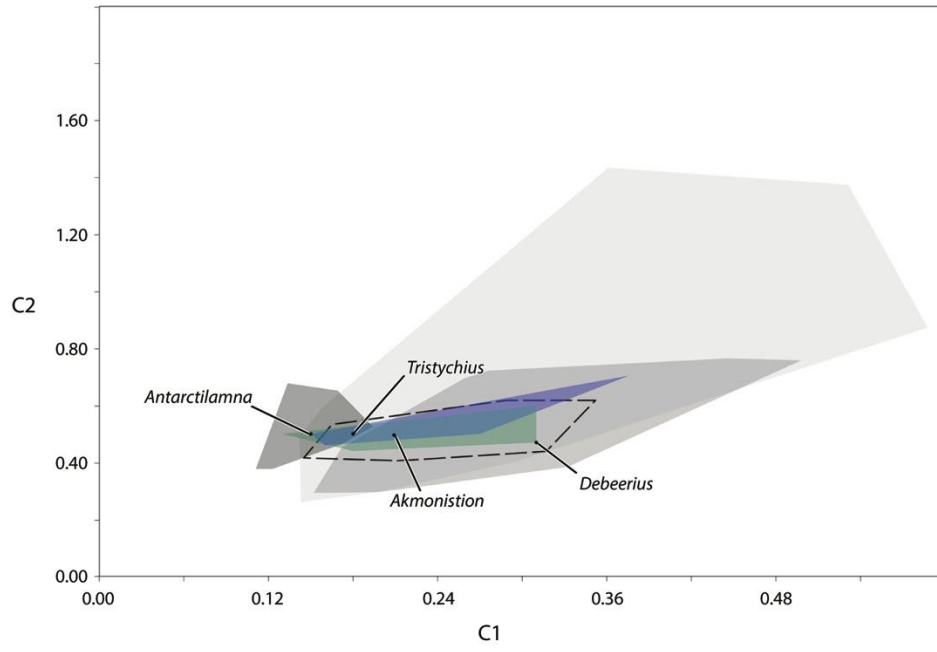

**B**

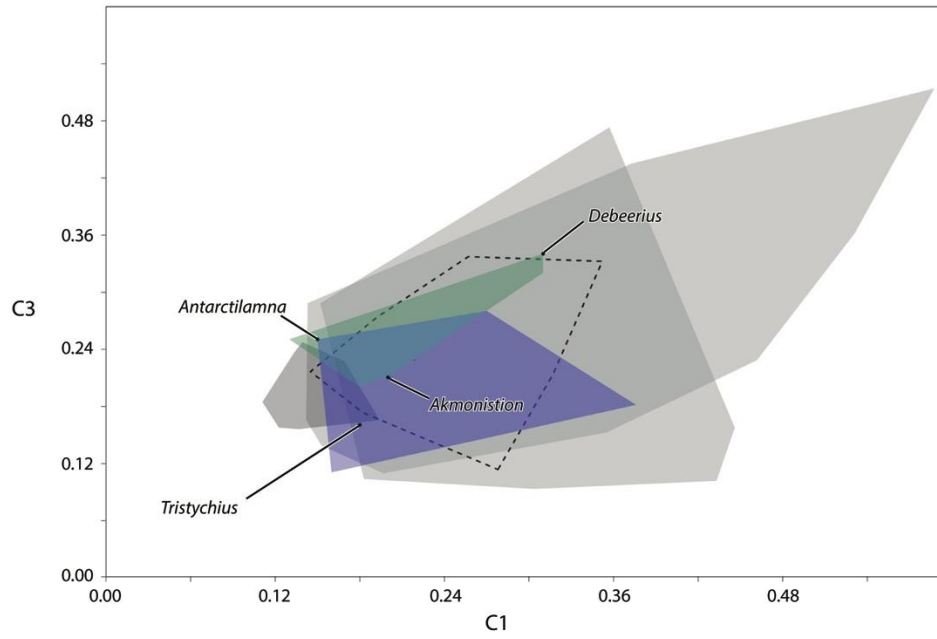

**Fig. S8. Morphospace for early gnathostomes relative to jaw measurement characters from Anderson *et al.* (36).** (A) Measurements C1 vs. C2. (B) Measurements C1 vs. C3. Data supplement in table S3. Gray regions, from lightest to darkest, are sarcopterygians, placoderms and actinopterygians. The remaining polygons represent the greater chondrichthyan radiation (16, 60): acanthodians in the dashed region, holocephalans in green, and elasmobranchs in blue, with several early chondrichthyan taxa highlighted. Note that *Tristychius*, when plotted in this morphospace does not stand out as particularly different from the rest of the elasmobranch taxa, despite presenting a jaw morphology not observed in any other elasmobranch in this data set. This serves to highlight the shortcomings of 2D morphometric data (in this case, chords measured in lateral view) to describe the complex 3D morphologies (38, 40).



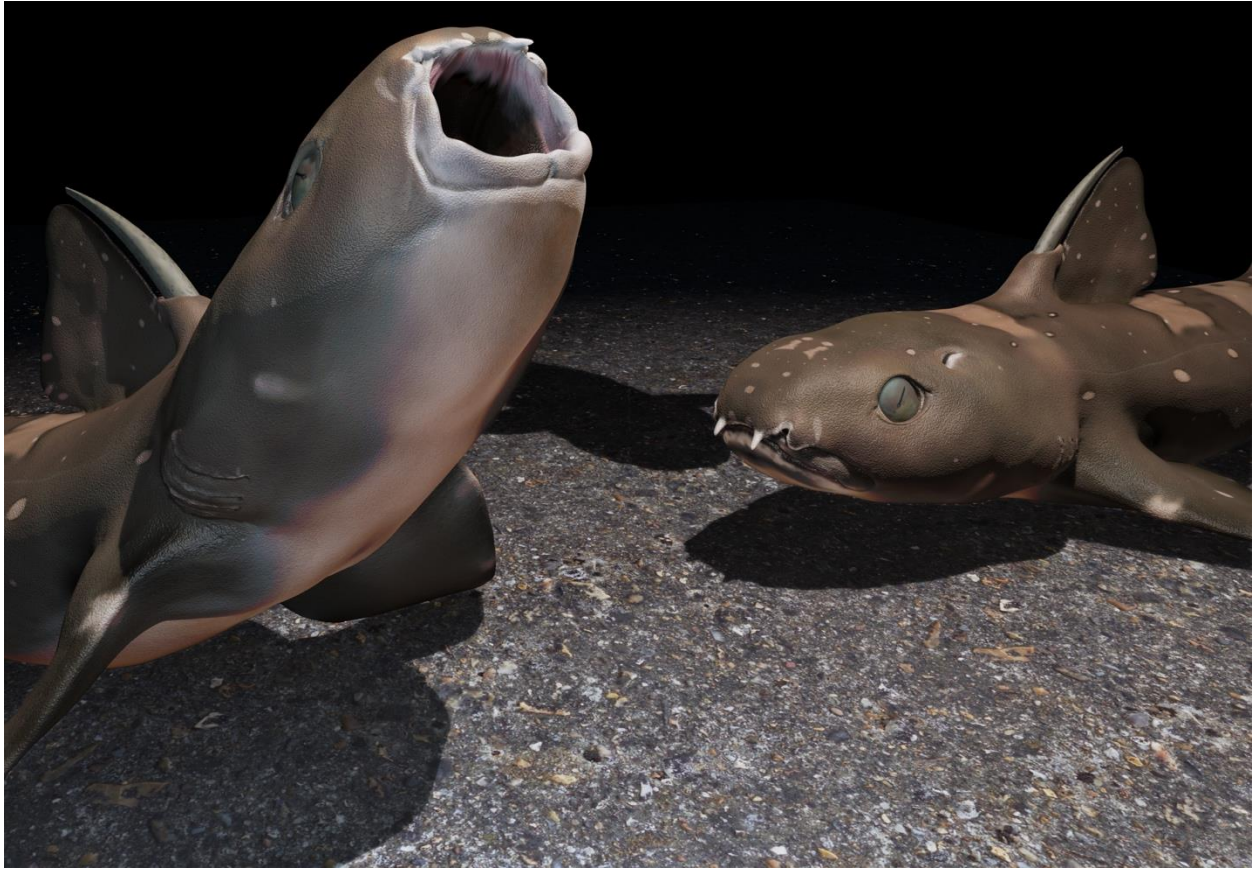

**Fig. S9. Life restoration of *T. arcuatus* from the Viséan Wardie Shales of Edinburgh, Scotland.**

## SUPPLEMENTARY TABLES

**Table S1. *T. arcuatus* specimens contributing to study.**

| National Museum of Scotland catalogue number | Field number | Figured                                                                                    | Summary notes                                                                                                                                            |
|----------------------------------------------|--------------|--------------------------------------------------------------------------------------------|----------------------------------------------------------------------------------------------------------------------------------------------------------|
| 1972.27.461A, B                              | SPW 171a, b  | Dick ( <i>12</i> ), Text-Fig. 11.                                                          | Cranium to pectoral girdle; external surfaces of cartilage, but contents absent. Scans poor.                                                             |
| 1972.27.481A-E                               |              | Dick ( <i>12</i> ), Text-Fig. 8A. Coates & Tietjen ( <i>13</i> ), Figs 2, 7a, 8, 9, 11a-d. | Neurocranium; jaws and hyoid arch; hyoid rays and gill arch rays; exceptionally complete gill skeleton; pectoral parts. Lateral compression. Scans good. |
| 1974.23.6                                    |              | Coates & Tietjen ( <i>13</i> ), Fig. 5.                                                    | Neurocranium; jaws and hyoid arch; hyoid rays and gill arch rays; complete gill skeleton; pectoral parts. Dorsoventral compression. Scans good.          |
| 1974.23.30A, B                               | SPW 730      | Coates & Tietjen ( <i>13</i> ), Fig. 6a-c.                                                 | Neurocranium; jaws and hyoid arch; hyoid rays and gill arch rays; complete gill skeleton. Dorsoventral compression. Scans good.                          |

|               |             |                                              |                                                        |
|---------------|-------------|----------------------------------------------|--------------------------------------------------------|
| 1974.51.2A, B | SPW 863a, b | Coates & Tietjen<br>(13), Fig. 6d-f.         | Neurocranium. Dorsoventral<br>compression. Scans good. |
| G2015.30.1    |             | Coates & Tietjen<br>(13), Fig. 4, 7b,<br>10. | Neurocranium. Dorsoventral<br>compression. Scans good. |



**Table S3. Additions to Anderson *et al.* (36) dataset of mandible metrics.**

| <b>Taxon</b>           | <b>Source</b>           | <b>Age</b>   | <b>C1</b> | <b>C2</b> | <b>C3</b> |
|------------------------|-------------------------|--------------|-----------|-----------|-----------|
| <i>Akmonistion</i>     | Coates & Sequeira (61). | Serpukhovian | 0.2       | 0.5       | 0.21      |
| <i>Antarctilamna</i>   | Young (68).             | Givetian     | 0.15      | 0.5       | 0.25      |
| <i>Cobelodus</i>       | Zangerl & Case (69).    | Moscovian    | 0.16      | 0.5       | 0.17      |
| <i>Damocles</i>        | Lund (70).              | Serpukhovian | 0.13      | 0.5       | 0.25      |
| <i>Debeerius</i>       | Grogan & Lund (9).      | Serpukhovian | 0.31      | 0.47      | 0.34      |
| <i>Diplodoselache</i>  | Dick (55).              | Viséan       | 0.2       | 0.5       | 0.23      |
| <i>Falcatus</i>        | Lund (71).              | Serpukhovian | 0.18      | 0.44      | 0.20      |
| <i>Gladbachus</i>      | Coates et al. (16).     | Givetian     | 0.21      | 0.5       | 0.16      |
| <i>Gogoselachus</i>    | Long et al. (72).       | Frasnian     | 0.2       | 0.49      | 0.23      |
| <i>Helicoprion</i>     | Tapinala et al. (73).   | Guadalupian  | 0.27      | 0.5       | 0.28      |
| <i>Orthacanthus</i>    | Hotton (62).            | Kasimovian   | 0.21      | 0.5       | 0.25      |
| Sibirhynchid           | Pradel (74).            | Gzhelian     | 0.31      | 0.6       | 0.32      |
| <i>Thrinacoselache</i> | Grogan & Lund (75).     | Serpukhovian | 0.16      | 0.46      | 0.11      |
| <i>Triodus</i>         | Heidtke et al.          | Kasimovian   | 0.21      | 0.5       | 0.23      |

(76).

*Tristychius*

Dick (12) and

Viséan

0.18

0.5

0.16

current

## SUPPLEMENTARY MOVIES

**Movie S1. Jaw and hyoid motion sequences modeled in caudal view.** Movement constraints at cranial joints described in Materials and Methods section: [Virtual simulation methods.](#)

**Movie S2. Jaw and hyoid motion sequences modeled in cranial view.** Movement constraints at cranial joints described in Materials and Methods section: [Virtual simulation methods.](#)

**Movie S3. Jaw and hyoid motion sequences modeled in dorsal view.** Movement constraints at cranial joints described in Materials and Methods section: [Virtual simulation methods.](#)

**Movie S4. Jaw and hyoid motion sequences modeled in lateral view.** Movement constraints at cranial joints described in Materials and Methods section: [Virtual simulation methods.](#)

**Movie S5. Jaw and hyoid motion sequences modeled in ventral view.** Movement constraints at cranial joints described in Materials and Methods section: [Virtual simulation methods.](#)

**Movie S6. Animation of complete cranial to pectoral skeleton opening and closing jaws, ingesting prey.** Sequence of movements follows motion sequence described in Fig. 3; timing, with rapid expansive and slower compressive phases, after observations by Motta *et al.* (29); pectoral shrug after Camp *et al.* (24).
